# Supplementary material
Source: PubMed Central journal article supplement (PMC8246256)
Supplement: EMBJ-40-e103311-s001.pdf [file EMBJ-40-e103311-s001.pdf]

# Appendix for

## Generalized displacement of DNA- and RNA-binding factors mediates the toxicity of arginine-rich cell-penetrating peptides

V. Lafarga, O. Sirozh, I. Díaz-López, A. Galarreta, M. Hisaoka, E. Zarzuela, J. Boskovic, B. Jovanovic, R. Fernandez-Leiro, J. Muñoz, G. Stoecklin, I. Ventoso, O. Fernandez-Capetillo

### CONTENTS

#### APPENDIX FIGURES

- 1. Appendix Figure S1:** Effects of BSA, (GA)<sub>20</sub> and (GR)<sub>20</sub> peptides on in vitro reactions using nucleic acids.
- 2. Appendix Figure S2:** Effect of (PR)<sub>20</sub> peptides on biochemical reactions using protein substrates.
- 3. Appendix Figure S3:** Cell entry, toxicity and transfection capacities of arginine-rich peptides and controls ((GA)<sub>20</sub> and (PK)<sub>20</sub>).
- 4. Appendix Figure S4:** Toxicity of arginine-rich peptides in motor neurons.

#### APPENDIX TABLES

- 5. Appendix Table S1:** Proteins with significantly reduced levels on ribosomal fractions purified from (PR)<sub>20</sub>-treated HeLa-RPS9SBP cells.
- 6. Appendix Table S2:** Proteins that show statistically significant reduced levels on chromatin after treatment of U2OS cells with (PR)<sub>20</sub> (20  $\mu$ M) or protamine (30  $\mu$ M).
- 7. Appendix Table S3:** Displacement of factors from RNA by protamine or (PR)<sub>20</sub> peptides.

**A**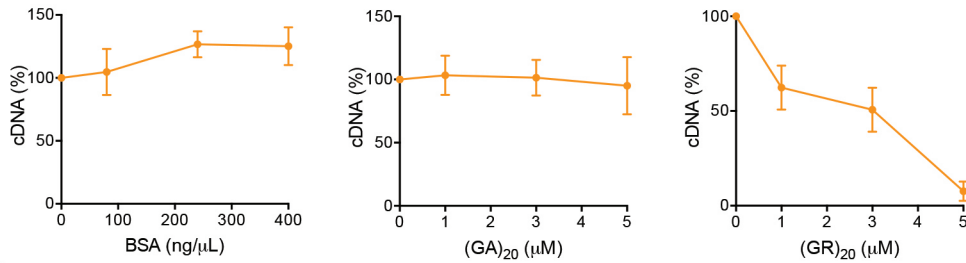**B**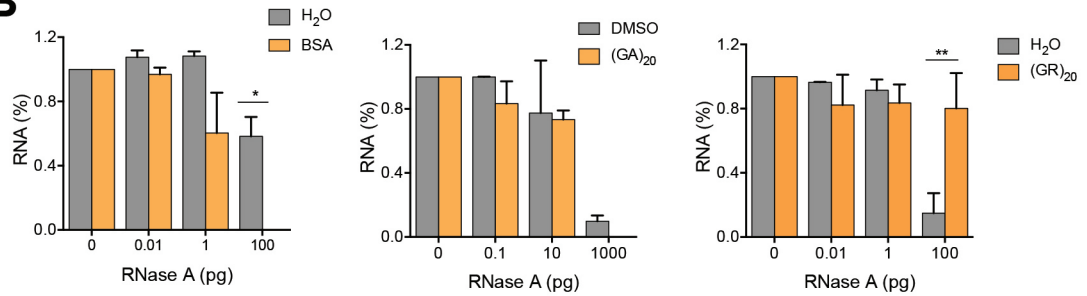**C**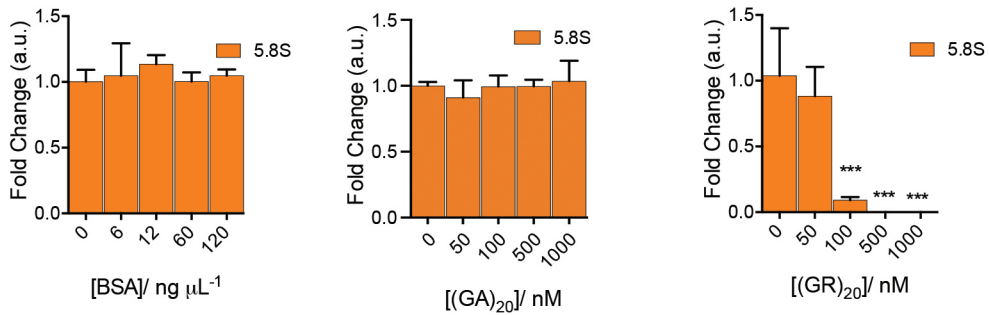

**Appendix Figure S1** Effects of BSA, (GA)<sub>20</sub> and (GR)<sub>20</sub> peptides on in vitro reactions using nucleic acids. **(A)** Reverse transcription of RNA (500 ng) with oligo-dT in the presence of increasing doses of BSA, (GA)<sub>20</sub> or (PR)<sub>20</sub>. Data represent the fluorometric quantification of the resultant cDNA (n=3). **(B)** Percentage of RNA (1 μg) remaining after a 15' digestion with increasing doses of RNase A in the presence or absence of BSA, (GA)<sub>20</sub> or (PR)<sub>20</sub> (5 μM) (n=3). **(C)** Percentage of 5.8 rRNA levels quantified by qPCR in reactions containing increasing doses of BSA, (GA)<sub>20</sub> or (PR)<sub>20</sub> (n=3). \*, p<0.05; \*\*, p<0.01; \*\*\*, p<0.001.

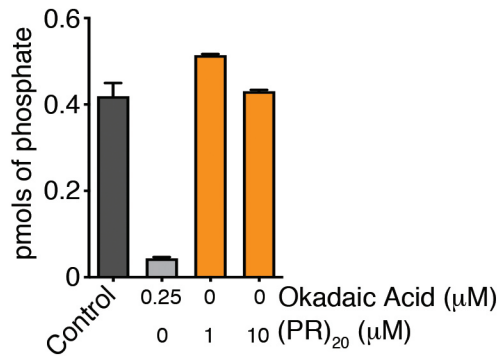

**Appendix Figure S2** Effect of (PR)<sub>20</sub> peptides on biochemical reactions using protein substrates. **(A)** PP2A in vitro phosphatase assay performed in the presence or absence of (PR)<sub>20</sub> or Okadaic acid (a phosphatase inhibitor). PP2A activity is measured through the liberation of phosphates from a KRpTIRR peptide. **(B)** Immunofluorescence of HA-(PR)<sub>20</sub> or (PK)<sub>20</sub> (green) in U2OS cells treated with 7.5 μM of each peptide for 1 h. Scale bar (white) indicates 2.5 μm. DAPI was used to stain DNA. **(C)** Percentage of viable cells as evaluated with a CellTiter-Glo luminescent assay in U2OS cells treated with increasing doses of (PR)<sub>20</sub> or (PK)<sub>20</sub> peptides at the indicated doses.

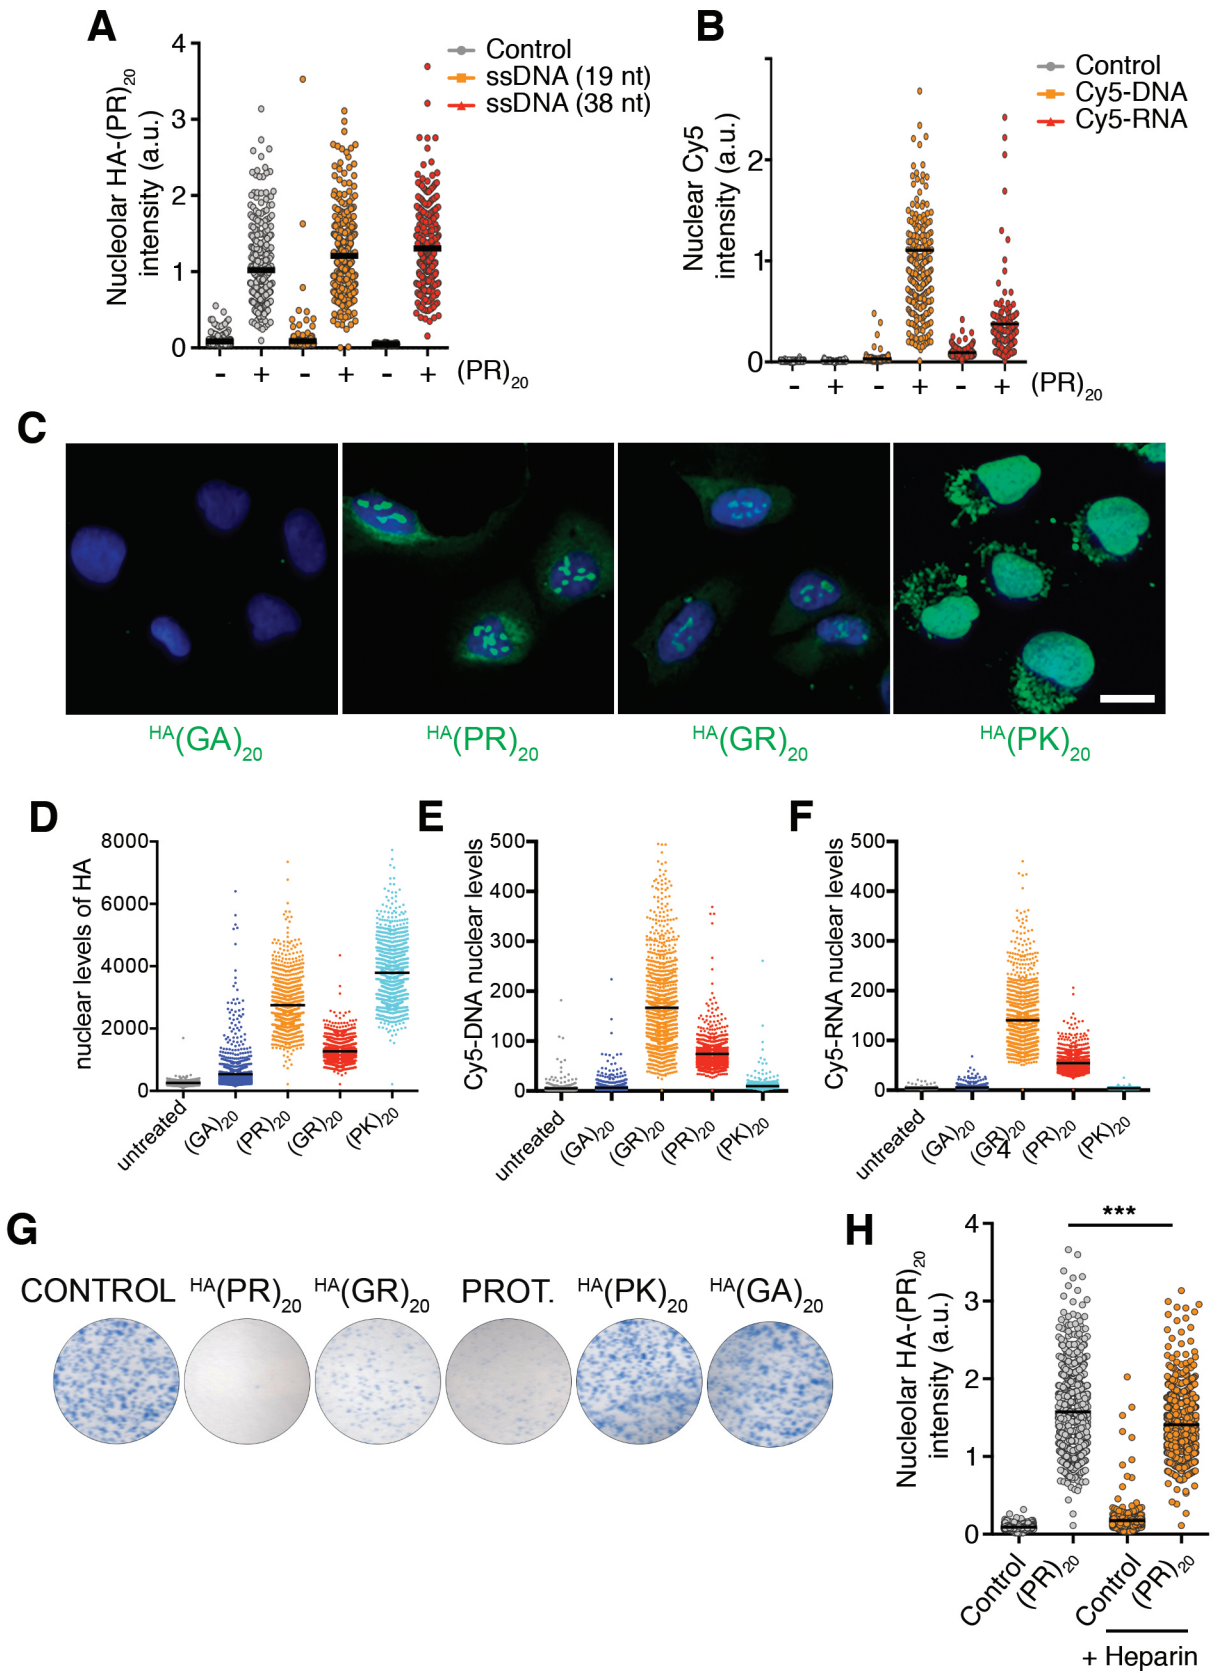

**Appendix Figure S3** Cell entry, toxicity and transfection capacities of arginine-rich peptides and controls ((GA)<sub>20</sub> and (PK)<sub>20</sub>). **(A)** HTM-mediated quantification of the nucleolar levels of an HA-(PR)<sub>20</sub> peptide in U2OS cells treated with 7.5 μM HA-(PR)<sub>20</sub> alone or together with 2 μM of 19 or 38 nt ssDNA oligonucleotides for 8 h. **(B)** HTM-mediated quantification of the nuclear levels of Cy5-labeled ssDNA or ssRNA 19 nt oligonucleotides in U2OS cells treated with 7.5 μM HA-(PR)<sub>20</sub> alone or together with 4 μM of the oligonucleotides for 8 h. Black lines indicate mean values. Examples of the images used for the analysis shown in **(A,B)** are shown in **Fig. 6D,E**. **(C)** Immunofluorescence using anti-HA antibody (green) in U2OS cells treated with 7.5 μM of the different peptides for 4 hours. Scale bar (white), 2.5 μm. **(D)** HTM-mediated analysis of the nuclear levels of HA-tagged peptides from the experiment defined in **(C)**. **(E,F)** HTM-mediated quantification of the nuclear levels of Cy5-labeled ssDNA **(E)** or ssRNA **(F)** oligonucleotides in U2OS cells treated with 7.5 μM of the indicated peptides alone or together with 2 μM of the oligonucleotides for 8 h. **(G)** Clonogenic survival assay of U2OS cells exposed to 7.5 μM of the indicated peptides. **(H)** HTM-mediated quantification of the nucleolar levels of an HA-(PR)<sub>20</sub> peptide in U2OS cells treated with 7.5 μM of (PR)<sub>20</sub> alone or together heparin (0.5 μM).

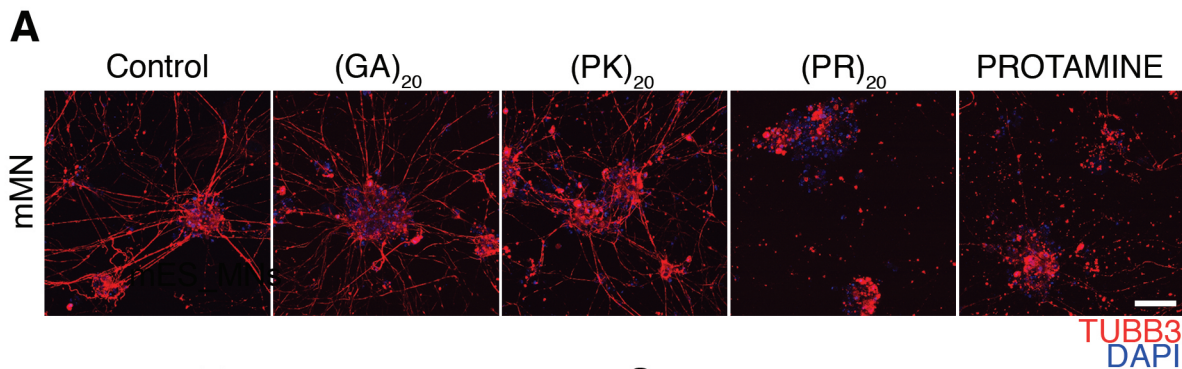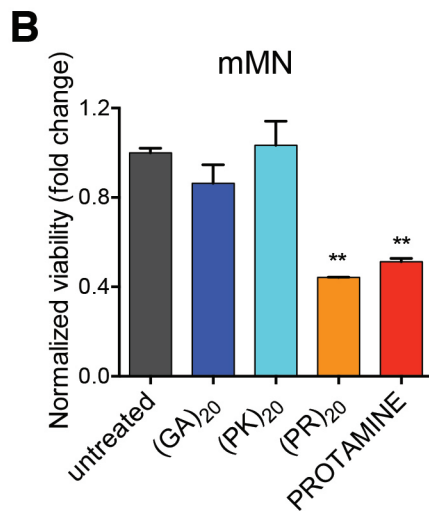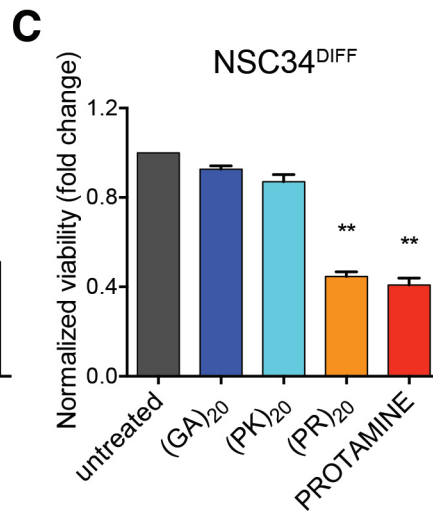



**Appendix Figure S4** Toxicity of arginine-rich peptides in motor neurons. **(A)** Immunofluorescence of the neuronal marker TUBB3 (red) in differentiated mouse motor neurons (mMN) treated with 2.5 $\mu$ M of the indicated peptides for 24h. Scale bar (white), 10  $\mu$ m. **(B,C)** Viability of mMN **(B)** and differentiated NSC34 cells (NSC34<sup>DIFF</sup>) **(C)** exposed to 2.5  $\mu$ M of different peptides for 24 and 38h, respectively, quantified using the CellTiter-Glo luminescence assay. \*\*, p<0.01.

**Appendix Table S1.** Proteins with significantly reduced levels on ribosomal fractions purified from (PR)<sub>20</sub>-treated HeLa-RPS9<sup>SBP</sup> cells.

| Gene Name | Log <sub>2</sub> ((PR) <sub>20</sub> /control) |
|-----------|------------------------------------------------|
| PSME3     | -3.61                                          |
| H1FX      | -1.94                                          |
| RPL27A    | -1.76                                          |
| RPLP2     | -1.71                                          |
| BRIX1     | -1.52                                          |
| GTPBP4    | -1.35                                          |
| RPL32     | -1.32                                          |
| KRR1      | -1.22                                          |
| NAP1L4    | -1.21                                          |
| HP1BP3    | -1.20                                          |
| RPL3      | -0.99                                          |
| RPL14     | -0.87                                          |
| RPL10A    | -0.70                                          |
| RPL6      | -0.66                                          |
| UTP14A    | -0.65                                          |
| RPL9      | -0.63                                          |

**Appendix Table S2.** Proteins that show statistically significant reduced levels on chromatin after treatment of U2OS cells with (PR)<sub>20</sub> (20 μM) or protamine (30 μM).

| Gen Symbol    | Log <sub>2</sub> ((PR) <sub>20</sub> /control) | Log <sub>2</sub> (PROTAMINE/control) |
|---------------|------------------------------------------------|--------------------------------------|
| FURIN         | -2.45                                          | -3.61                                |
| POTEJ         | -2.05                                          | -2.15                                |
| POTEKP        | -1.72                                          | -1.63                                |
| TMEM126B      | -1.40                                          | -1.19                                |
| POTEF         | -1.38                                          | -1.20                                |
| HIST1H1C      | -1.33                                          | -0.61                                |
| FARS2         | -1.28                                          | -0.75                                |
| HIST1H1A      | -1.27                                          | -0.46                                |
| SNX5          | -1.06                                          | -0.82                                |
| H1FO          | -1.05                                          | -0.39                                |
| PITPNA        | -1.02                                          | -0.60                                |
| PDK2          | -1.01                                          | -0.64                                |
| GLTSCR2       | -1.01                                          | -0.42                                |
| EEF1B2        | -1.01                                          | -0.86                                |
| EEF1G         | -0.98                                          | -0.75                                |
| GAPDH         | -0.97                                          | -0.80                                |
| NRF1          | -0.96                                          | -0.90                                |
| PSMF1         | -0.93                                          | -0.42                                |
| AURKC         | -0.92                                          | -0.87                                |
| CORO1B        | -0.88                                          | -0.47                                |
| EBAG9         | -0.87                                          | -0.64                                |
| APEX1         | -0.86                                          | -0.70                                |
| EEF1D         | -0.83                                          | -0.69                                |
| ALDOC         | -0.82                                          | -0.45                                |
| REPIN1        | -0.82                                          | -0.54                                |
| H2AFY         | -0.82                                          | -0.43                                |
| RXRB          | -0.75                                          | -0.50                                |
| HMGA1         | -0.75                                          | -0.68                                |
| TPT1          | -0.73                                          | -0.65                                |
| RPUSD4        | -0.72                                          | -0.87                                |
| DNAJC15       | -0.70                                          | -0.40                                |
| RING1         | -0.70                                          | -0.57                                |
| PCBP3         | -0.67                                          | -0.41                                |
| HMGA2         | -0.66                                          | -0.51                                |
| SLC25A40      | -0.65                                          | -0.41                                |
| HN1L          | -0.65                                          | -0.40                                |
| MEN1          | -0.65                                          | -0.40                                |
| MSN           | -0.64                                          | -0.58                                |
| HDGF          | -0.62                                          | -0.44                                |
| HCFC1         | -0.62                                          | -0.52                                |
| TGIF2LX       | -0.62                                          | -0.52                                |
| HMGB1;HMGB1P1 | -0.62                                          | -0.50                                |
| LRRC57        | -0.60                                          | -0.49                                |
| FLNA          | -0.60                                          | -0.50                                |
| RANBP1        | -0.60                                          | -0.59                                |
| NCKIPSD       | -0.59                                          | -0.61                                |

|          |       |       |
|----------|-------|-------|
| EZR      | -0.58 | -0.51 |
| CMSS1    | -0.58 | -0.35 |
| LANCL2   | -0.58 | -0.58 |
| CSRP2    | -0.58 | -0.48 |
| TMF1     | -0.58 | -0.44 |
| EEF1A2   | -0.56 | -0.54 |
| TARS     | -0.56 | -0.45 |
| CDYL     | -0.56 | -0.75 |
| DIDO1    | -0.55 | -0.44 |
| AHNAK    | -0.55 | -0.48 |
| ACAP2    | -0.55 | -0.39 |
| SYNGR3   | -0.55 | -0.60 |
| PALM2    | -0.55 | -0.48 |
| ARHGAP17 | -0.55 | -0.57 |
| ID1      | -0.55 | -0.39 |
| CCAR1    | -0.54 | -0.40 |
| RPL18    | -0.54 | -0.38 |
| COPS7A   | -0.54 | -0.51 |
| CCDC50   | -0.53 | -0.53 |
| ZBTB10   | -0.53 | -0.88 |
| CCNC     | -0.53 | -0.38 |
| SFSWAP   | -0.52 | -0.60 |
| SLC43A3  | -0.52 | -0.45 |
| WASF2    | -0.52 | -0.61 |
| SPR      | -0.52 | -0.74 |
| GAP43    | -0.51 | -0.97 |
| FSCN1    | -0.51 | -0.40 |
| VPS39    | -0.51 | -0.57 |
| FUS      | -0.50 | -0.46 |
| SARS     | -0.50 | -0.46 |
| FIP1L1   | -0.49 | -0.38 |
| DIAPH2   | -0.49 | -0.67 |
| CSTF2    | -0.49 | -0.40 |
| SCAF4    | -0.49 | -0.36 |
| CBX8     | -0.48 | -0.47 |
| PRPF38B  | -0.48 | -0.35 |
| DCUN1D1  | -0.47 | -0.61 |
| DDX31    | -0.47 | -0.45 |
| PDLIM7   | -0.47 | -0.41 |
| RECQL    | -0.47 | -0.36 |
| FNBP4    | -0.47 | -0.40 |
| EHD3     | -0.46 | -0.38 |
| SCAF1    | -0.46 | -0.37 |
| MRGBP    | -0.46 | -0.54 |
| MAVS     | -0.45 | -0.38 |
| CORO1C   | -0.45 | -0.55 |
| MINA     | -0.45 | -0.48 |
| COPS8    | -0.45 | -0.74 |
| TCERG1   | -0.45 | -0.42 |
| NEDD1    | -0.44 | -0.59 |
| SEPT9    | -0.44 | -0.43 |
| HDGFRP3  | -0.44 | -0.36 |
| FAHD1    | -0.44 | -0.73 |

|       |       |       |
|-------|-------|-------|
| FKBP3 | -0.43 | -0.42 |
|-------|-------|-------|

**Appendix Table S3.** Displacement of factors from RNA by protamine or (PR)<sub>20</sub> peptides. The first column indicates the enrichment of the protein on RNA in control conditions and the next two how this binding is affected by protamine or (PR)<sub>20</sub> peptides.

| Gen Symbol | Enrichment on RNA<br>Log <sub>2</sub> (CL/noCL) | Effect of (PR) <sub>20</sub><br>Log <sub>2</sub> ((PR) <sub>20</sub> /control) | Effect of protamine<br>Log <sub>2</sub> (protamine/control) |
|------------|-------------------------------------------------|--------------------------------------------------------------------------------|-------------------------------------------------------------|
| PHYKPL     | 10,16                                           | -9,39                                                                          | -9,48                                                       |
| NPC1       | 6,89                                            | -8,75                                                                          | -1,75                                                       |
| NUP153     | 9,12                                            | -8,35                                                                          | -1,38                                                       |
| SCUBE1     | 6,73                                            | -5,96                                                                          | -1,72                                                       |
| PDE7B      | 6,93                                            | -5,91                                                                          | -1,69                                                       |
| G3BP2      | 4,13                                            | -4,73                                                                          | -1,95                                                       |
| CNBP       | 6,18                                            | -4,55                                                                          | -0,16                                                       |
| GLTSCR2    | 5,94                                            | -4,09                                                                          | -5,26                                                       |
| CSTF2T     | 8,29                                            | -4,02                                                                          | -1,05                                                       |
| ELAVL2     | 7,78                                            | -3,86                                                                          | -1,09                                                       |
| EIF3G      | 8,94                                            | -3,68                                                                          | -0,99                                                       |
| PPIL4      | 4,79                                            | -3,65                                                                          | -2,12                                                       |
| RNMTL1     | 4,41                                            | -3,64                                                                          | -0,76                                                       |
| RBMS2      | 4,01                                            | -3,62                                                                          | -0,44                                                       |
| RBM5       | 6,06                                            | -3,62                                                                          | -3,02                                                       |
| MRPL41     | 4,38                                            | -3,61                                                                          | -0,16                                                       |
| UGP2       | 4,34                                            | -3,57                                                                          | -0,69                                                       |
| CSTF2      | 8,91                                            | -3,55                                                                          | -1,43                                                       |
| SSB        | 6,28                                            | -3,53                                                                          | -0,57                                                       |
| FCF1       | 6                                               | -3,49                                                                          | -1,28                                                       |
| PSPC1      | 9,97                                            | -3,48                                                                          | -0,76                                                       |
| EIF4B      | 6,54                                            | -3,48                                                                          | -0,65                                                       |
| NUP107     | 6,73                                            | -3,44                                                                          | -1,59                                                       |
| R3HDM1     | 5,96                                            | -3,41                                                                          | -2,48                                                       |
| RBM47      | 4,93                                            | -3,35                                                                          | -1                                                          |
| RPL22L1    | 6,67                                            | -3,31                                                                          | -1,21                                                       |
| RPS28      | 4,68                                            | -3,29                                                                          | 0,07                                                        |
| RBM6       | 5,97                                            | -3,27                                                                          | -0,66                                                       |
| KHSRP      | 7,45                                            | -3,23                                                                          | -0,71                                                       |
| PABPC5     | 3,98                                            | -3,21                                                                          | -0,58                                                       |
| REXO4      | 5,12                                            | -3,19                                                                          | -2,57                                                       |
| PURB       | 6,28                                            | -3,18                                                                          | -1,15                                                       |
| G3BP1      | 7,09                                            | -3,1                                                                           | -1,26                                                       |
| RPUSD4     | 4,4                                             | -3,08                                                                          | -1,2                                                        |
| PTBP2      | 7,57                                            | -3,08                                                                          | -0,48                                                       |
| UTP11L     | 6,12                                            | -3,04                                                                          | -0,61                                                       |
| EIF4H      | 6,8                                             | -3,04                                                                          | -0,85                                                       |
| HNRNPD     | 8,68                                            | -3                                                                             | -0,62                                                       |
| FUBP3      | 8,75                                            | -2,98                                                                          | -0,76                                                       |

|           |       |       |       |
|-----------|-------|-------|-------|
| FUBP1     | 10,32 | -2,95 | -1,01 |
| RBM3      | 6,75  | -2,94 | 0,16  |
| RRP36     | 7,74  | -2,93 | -2,26 |
| RBM12     | 5,38  | -2,9  | -0,67 |
| KHDRBS3   | 4,44  | -2,89 | 0,37  |
| NUDT21    | 4,46  | -2,87 | -0,18 |
| LSM14A    | 4,34  | -2,87 | -1,04 |
| CELF2     | 4,9   | -2,85 | -2,77 |
| RBM4      | 5,83  | -2,85 | -0,75 |
| HNRNPC    | 10,42 | -2,82 | -0,64 |
| CAP1      | 3,31  | -2,79 | 0,43  |
| TIA1      | 8,42  | -2,78 | -0,94 |
| NSUN5     | 5,85  | -2,78 | -2,61 |
| NOP16     | 6,41  | -2,75 | -1,12 |
| GRSF1     | 6,63  | -2,74 | -0,27 |
| RBM4B     | 4,86  | -2,69 | -1,49 |
| SLIRP     | 7,7   | -2,64 | -0,33 |
| PRR3      | 4,55  | -2,63 | -1,15 |
| RBM22     | 8,04  | -2,59 | -1,75 |
| MYO5C     | 5,3   | -2,58 | -0,79 |
| PUM2      | 8,26  | -2,58 | -0,89 |
| ELAVL1    | 10,75 | -2,57 | -0,78 |
| DSG3      | 6,11  | -2,55 | 0,54  |
| HNRNPA0   | 7,87  | -2,55 | -0,66 |
| HNRNPDL   | 7,88  | -2,54 | -0,28 |
| PURA      | 6,86  | -2,54 | -0,92 |
| SYNCRIP   | 8,8   | -2,52 | -1,29 |
| YBX3      | 9,75  | -2,51 | -0,97 |
| TIAL1     | 9,93  | -2,51 | -1,13 |
| LSM2      | 5,14  | -2,49 | -0,95 |
| YBX1      | 6,95  | -2,47 | -1,09 |
| RNMT      | 3,58  | -2,46 | -0,58 |
| KRR1      | 7,19  | -2,45 | -2,19 |
| DAZAP1    | 8,35  | -2,44 | -0,78 |
| RAVER1    | 8     | -2,44 | -0,58 |
| MSI1      | 3,2   | -2,43 | -2,52 |
| EXOSC2    | 3,18  | -2,42 | -2,51 |
| HDLBP     | 9,45  | -2,41 | -1,12 |
| PUF60     | 8,67  | -2,39 | -0,78 |
| MRPL13    | 6,85  | -2,38 | 0,29  |
| HNRNPH3   | 8,33  | -2,38 | -0,48 |
| CELF1     | 8,5   | -2,36 | -0,95 |
| URB1      | 8,82  | -2,35 | -2,17 |
| MBNL1     | 5,07  | -2,35 | 0,2   |
| HNRNPA2B1 | 8,27  | -2,35 | -0,48 |

|           |       |       |       |
|-----------|-------|-------|-------|
| IMP4      | 4,07  | -2,33 | -1,33 |
| EIF1      | 3,09  | -2,32 | 1,93  |
| NCKAP1    | 4,48  | -2,32 | -2,22 |
| CCDC59    | 6,15  | -2,32 | -2,23 |
| RBMS1     | 4,3   | -2,29 | -0,9  |
| CSDE1     | 7,26  | -2,29 | -1,2  |
| SEC61B    | 5,27  | -2,28 | -1,31 |
| SFPQ      | 9,27  | -2,28 | -1,14 |
| HNRNPAB   | 8,28  | -2,28 | -0,22 |
| DUSP14    | 3,04  | -2,27 | 1,34  |
| DCAF13    | 8,46  | -2,26 | -0,78 |
| RBM10     | 7,97  | -2,26 | -1,33 |
| FYTTD1    | 6,35  | -2,26 | -2,71 |
| GAR1      | 8,95  | -2,25 | -1,2  |
| NCL       | 8,53  | -2,24 | -1,04 |
| HNRNPH1   | 6,77  | -2,24 | -0,68 |
| MPHOSPH10 | 3,6   | -2,21 | -0,3  |
| FUS       | 8,1   | -2,21 | -0,85 |
| AKAP8     | 5,07  | -2,19 | -0,75 |
| SURF6     | 5,71  | -2,19 | -2,67 |
| MBNL2     | 4,13  | -2,19 | -0,94 |
| UTP23     | 4,2   | -2,17 | -3,05 |
| NXF1      | 4,13  | -2,17 | 0,64  |
| PSMC2     | 9,65  | -2,16 | -0,72 |
| ZCCHC3    | 8,19  | -2,15 | -1,22 |
| C14orf166 | 3,33  | -2,14 | 1,35  |
| SF3B4     | 8,37  | -2,14 | -0,88 |
| RBM38     | 7,13  | -2,13 | -1,05 |
| RPL7L1    | 5,79  | -2,11 | -2,65 |
| GSTP1     | 3,13  | -2,11 | 0,21  |
| PCBP3     | 5,01  | -2,08 | -0,68 |
| NONO      | 9,87  | -2,08 | -1,17 |
| FAM98B    | 4,75  | -2,06 | -0,45 |
| MRPS23    | 3,72  | -2,03 | -0,39 |
| ATP6V1C2  | 4,38  | -2,03 | -0,06 |
| SRSF9     | 6,46  | -2,02 | -0,1  |
| EVPL      | 3,08  | -2,01 | 0,67  |
| IGF2BP3   | 7,09  | -2,01 | -0,5  |
| RALY      | 13,95 | -2,01 | -0,94 |
| MRPL42    | 5,06  | -2,01 | 0,01  |
| HNRNPF    | 7,67  | -2    | -0,57 |
| RPF1      | 4,83  | -2    | -3,43 |
| SAFB2     | 3,53  | -2    | 0,98  |
| IGF2BP2   | 7,97  | -1,99 | -0,93 |
| RBMXL1    | 5,11  | -1,96 | 0,36  |



|         |       |       |       |
|---------|-------|-------|-------|
| RBM14   | 10,15 | -1,96 | -0,38 |
| NGDN    | 5,29  | -1,96 | -1,35 |
| MSI2    | 4,39  | -1,95 | -0,85 |
| PABPN1  | 8,28  | -1,94 | -1,45 |
| ZC3H7A  | 5,77  | -1,94 | -1,26 |
| HNRNPA1 | 7,8   | -1,94 | -0,34 |
| SERBP1  | 8,15  | -1,94 | -0,78 |
| C3      | 4,92  | -1,94 | 1,12  |
| HNRNPM  | 5,25  | -1,92 | -0,61 |
| ARHGDI1 | 7,11  | -1,92 | -0,51 |
| BYSL    | 6,97  | -1,91 | -1,3  |
| MRPL1   | 5,33  | -1,9  | 0,28  |
| TTN     | 4,28  | -1,88 | 0,04  |
| EDF1    | 3,39  | -1,85 | -0,51 |
| GNL2    | 5,15  | -1,85 | -3,14 |
| TACO1   | 4,95  | -1,83 | -0,78 |
| PUM1    | 9,4   | -1,83 | -0,5  |
| UTP14A  | 6,68  | -1,81 | -1,1  |
| IMP3    | 5,59  | -1,8  | -0,47 |
| DDX1    | 7,32  | -1,79 | 0,18  |
| FAM98A  | 7     | -1,79 | -0,64 |
| FASTKD2 | 9     | -1,77 | -0,73 |
| UTP3    | 7,65  | -1,75 | -1,58 |
| CAPRN1  | 9,6   | -1,74 | -0,96 |
| TARDBP  | 8,71  | -1,74 | -0,47 |
| HNRNPLL | 8     | -1,72 | -0,82 |
| HNRNPH2 | 6,7   | -1,72 | -0,65 |
| CPEB4   | 3,68  | -1,72 | -0,94 |
| API5    | 6,32  | -1,72 | 0,61  |
| PCBP1   | 6,35  | -1,71 | -0,94 |
| SUB1    | 5,24  | -1,71 | 0,18  |
| FBLL1   | 5,44  | -1,71 | -1,09 |
| SKIV2L2 | 5,33  | -1,71 | 1,26  |
| SF1     | 7,89  | -1,71 | -0,43 |
| XPO5    | 4,29  | -1,7  | -0,82 |
| NHP2    | 5,02  | -1,7  | -0,32 |
| PSME2   | 3,67  | -1,69 | -0,04 |
| RSL1D1  | 8,65  | -1,68 | -0,51 |
| MEX3D   | 3,14  | -1,66 | -0,52 |
| DDX56   | 8,23  | -1,66 | -1,15 |
| PRPF6   | 3,29  | -1,65 | -0,26 |
| WDR33   | 5,42  | -1,64 | -0,79 |
| RRP7A   | 4,03  | -1,64 | -0,34 |
| PPP1R10 | 5,78  | -1,63 | -0,86 |
| ILF2    | 6,53  | -1,63 | -0,5  |

|          |       |       |       |
|----------|-------|-------|-------|
| EBNA1BP2 | 9,1   | -1,62 | -1,63 |
| SND1     | 10,16 | -1,62 | -1,43 |
| NOC3L    | 6,32  | -1,62 | -1,51 |
| HNRNPA3  | 6,82  | -1,61 | -0,04 |
| MRPS18A  | 4,81  | -1,61 | 1,8   |
| NPM1     | 4,63  | -1,6  | 0,12  |
| RBM28    | 5,25  | -1,58 | -2,41 |
| RBM19    | 6,23  | -1,57 | -1,13 |
| RPL22    | 6,14  | -1,57 | -0,19 |
| SRSF7    | 7,95  | -1,56 | -0,5  |
| PCBP2    | 7,65  | -1,55 | -0,6  |
| RAP1A    | 3,93  | -1,55 | -0,64 |
| MRPS31   | 5,3   | -1,55 | -1,49 |
| ILF3     | 5,02  | -1,55 | -0,59 |
| HNRNPR   | 9,61  | -1,54 | -0,79 |
| NSA2     | 5,87  | -1,54 | -3,98 |
| ZC3H7B   | 4,26  | -1,54 | -0,89 |
| LSM14B   | 5,12  | -1,53 | -0,16 |
| SRSF3    | 9,4   | -1,52 | -0,15 |
| PATL1    | 4,21  | -1,51 | -0,93 |
| FAM120A  | 5,55  | -1,47 | -0,97 |
| DDX47    | 6,08  | -1,47 | -1,25 |
| YBX2     | 4,61  | -1,46 | -1,44 |
| USP10    | 6,99  | -1,46 | -1,58 |
| SFN      | 3,29  | -1,46 | 1,39  |
| ISG20L2  | 4,84  | -1,45 | -1,81 |
| UTP15    | 7,82  | -1,45 | -0,07 |
| RBM12B   | 5,07  | -1,45 | -0,74 |
| QKI      | 3,99  | -1,44 | -1,17 |
| CKAP4    | 3,18  | -1,41 | 0,52  |
| RRS1     | 8,18  | -1,4  | -0,93 |
| DDX27    | 8,16  | -1,39 | -2,3  |
| FBL      | 10,06 | -1,39 | -0,75 |
| PTBP1    | 7,02  | -1,39 | -0,29 |
| UBAP2    | 5,78  | -1,38 | -0,05 |
| NOL8     | 3,85  | -1,37 | 0,62  |
| ARHGEF40 | 4,33  | -1,36 | -2,86 |
| PTBP3    | 6,22  | -1,36 | -0,08 |
| PWP2     | 9,84  | -1,35 | 0,11  |
| TEX10    | 4,89  | -1,33 | -2,39 |
| SRSF2    | 10,43 | -1,33 | -0,69 |
| EWSR1    | 7,8   | -1,33 | -0,63 |
| SDAD1    | 6,61  | -1,33 | -2,17 |
| URB2     | 3,17  | -1,32 | -1,35 |
| AQR      | 5,69  | -1,32 | -1,54 |

|          |       |       |       |
|----------|-------|-------|-------|
| DDX31    | 6,52  | -1,3  | -2,93 |
| NOLC1    | 6,05  | -1,3  | -1,62 |
| RPL26    | 6,51  | -1,27 | -0,38 |
| SRSF1    | 6,84  | -1,27 | -0,1  |
| TRA2B    | 9,36  | -1,26 | 0,5   |
| DDX5     | 7,22  | -1,25 | -0,29 |
| PARP12   | 3,22  | -1,25 | -1,77 |
| SF3A3    | 5,28  | -1,24 | -0,68 |
| SUGP2    | 6,75  | -1,24 | -1,18 |
| U2AF2    | 10,26 | -1,23 | -0,94 |
| APOBEC3B | 8,26  | -1,23 | -0,02 |
| ZCCHC7   | 3,43  | -1,23 | 0,27  |
| DKC1     | 6,57  | -1,21 | 0,8   |
| HNRNPL   | 8,02  | -1,21 | -0,28 |
| NOP9     | 6,74  | -1,2  | 0,42  |
| DDX3X    | 7,93  | -1,2  | -0,59 |
| RBM15    | 7,09  | -1,18 | -0,15 |
| LLPH     | 4,44  | -1,16 | -2,29 |
| LRPPRC   | 7,25  | -1,16 | -0,51 |
| UPF1     | 6,51  | -1,16 | -0,94 |
| DDX21    | 11,71 | -1,15 | -0,52 |
| MRPL15   | 5,49  | -1,14 | -0,53 |
| SRSF6    | 8,59  | -1,1  | -0,62 |
| MATR3    | 3,69  | -1,09 | -0,15 |
| RBM7     | 5,25  | -1,09 | 0,21  |
| PTCD1    | 6,01  | -1,09 | -0,74 |
| IVL      | 3,02  | -1,09 | -0,01 |
| RBM42    | 3,38  | -1,09 | -1,93 |
| DHX15    | 8,22  | -1,08 | -0,33 |
| NOL11    | 6,54  | -1,08 | -0,62 |
| ZFR      | 5,93  | -1,08 | -0,53 |
| KIAA0020 | 8,53  | -1,07 | -1,84 |
| PI3      | 3,64  | -1,07 | -0,24 |
| RPF2     | 6,7   | -1,07 | -1,37 |
| ERAL1    | 5,28  | -1,06 | -0,37 |
| CMPK1    | 3,27  | -1,05 | 0,44  |
| NOP14    | 7,27  | -1,05 | -0,83 |
| RBM27    | 3,88  | -1,05 | -0,5  |
| DDX24    | 6,34  | -1,04 | -2,04 |
| ZNF326   | 8,07  | -1,04 | -0,17 |
| PRRC2A   | 3,04  | -1,04 | -0,14 |
| DDX6     | 5,97  | -1,03 | -0,06 |
| CHD1     | 3,54  | -1,03 | -2,3  |
| USP36    | 4,4   | -1,02 | -0,23 |
| GNL3L    | 5,17  | -1,02 | -1,95 |

|          |      |       |       |
|----------|------|-------|-------|
| DYNC2H1  | 3,59 | -1,01 | -0,11 |
| FARSA    | 3,24 | -1    | -0,45 |
| FAM25G   | 4,31 | -1    | 3,16  |
| RBMX     | 7,89 | -1    | 0,51  |
| PRPF38A  | 3,2  | -1    | -2,52 |
| CEBPZ    | 6,46 | -0,99 | -1,43 |
| HNRNPK   | 6,06 | -0,99 | -0,17 |
| CPSF4    | 4,08 | -0,98 | -1,24 |
| ZCCHC6   | 3,87 | -0,97 | -1,14 |
| RPA1     | 4,52 | -0,97 | -0,77 |
| DDX18    | 8,15 | -0,97 | -0,65 |
| RRP1     | 4,44 | -0,96 | -0,87 |
| DHX36    | 4,42 | -0,95 | 0,22  |
| KTN1     | 4,13 | -0,94 | -0,34 |
| RPS10    | 6,88 | -0,94 | -0,28 |
| BMS1     | 7,46 | -0,91 | -1,24 |
| AATF     | 4,92 | -0,9  | -0,59 |
| EIF4G2   | 3,89 | -0,9  | -0,32 |
| BRX1     | 7,94 | -0,89 | -1,36 |
| RPS3     | 7,44 | -0,89 | -1,11 |
| KHDRBS1  | 5,91 | -0,88 | 0,43  |
| DDX28    | 3,29 | -0,88 | -1,27 |
| NOP2     | 4,51 | -0,88 | -0,14 |
| HSP90B1  | 3,01 | -0,88 | -0,25 |
| PA2G4    | 6,35 | -0,87 | 0,89  |
| PPAN     | 7,85 | -0,86 | -0,14 |
| XRN2     | 8,18 | -0,86 | -0,25 |
| HNRNPUL2 | 7,83 | -0,85 | 0,09  |
| DBI      | 6,27 | -0,85 | -0,17 |
| RPL29    | 3,66 | -0,83 | 0,22  |
| MRPL44   | 4,14 | -0,82 | -1,11 |
| CHTOP    | 3,41 | -0,82 | -0,25 |
| MTPAP    | 4,7  | -0,82 | -0,88 |
| ZC3H14   | 7,18 | -0,8  | -0,28 |
| FMR1     | 3,26 | -0,8  | -0,34 |
| PABPC4   | 9,51 | -0,79 | -0,23 |
| ZC3HAV1  | 4,57 | -0,77 | -0,94 |
| SRSF5    | 5,76 | -0,77 | -0,24 |
| PAPD5    | 3,98 | -0,76 | -0,1  |
| LRRC59   | 5,48 | -0,76 | -0,05 |
| APOBEC3F | 5,16 | -0,76 | -0,63 |
| PTCD3    | 8,65 | -0,76 | -0,39 |
| MRPL3    | 5,16 | -0,74 | -0,35 |
| WDR46    | 7,76 | -0,73 | 0,53  |
| KIF4B    | 4,9  | -0,73 | -2,01 |

|         |      |       |       |
|---------|------|-------|-------|
| MKI67   | 4,42 | -0,73 | -0,79 |
| YTHDF3  | 5,09 | -0,73 | -0,18 |
| ALYREF  | 6,82 | -0,73 | -0,27 |
| EIF3A   | 5,92 | -0,72 | -0,24 |
| MRPL4   | 4,92 | -0,71 | -0,08 |
| RRP8    | 5,57 | -0,7  | -0,52 |
| RPS24   | 7,3  | -0,69 | 0,24  |
| LARP7   | 5,33 | -0,69 | 0,94  |
| MRPS5   | 7    | -0,69 | -0,72 |
| EIF4A1  | 3,35 | -0,68 | 0,06  |
| PNO1    | 3,27 | -0,68 | -0,31 |
| UBAP2L  | 8,02 | -0,68 | -0,3  |
| PARP1   | 3,92 | -0,68 | -0,3  |
| DDX17   | 8,79 | -0,67 | -0,18 |
| NSUN2   | 4,42 | -0,66 | -1,13 |
| MYBBP1A | 9,82 | -0,66 | -0,39 |
| EIF4A3  | 3,51 | -0,66 | 0,73  |
| TBRG4   | 7,66 | -0,65 | -0,09 |
| MRPS7   | 5,43 | -0,64 | -0,23 |
| YTHDF1  | 7,28 | -0,64 | -0,64 |
| MRPL45  | 4,26 | -0,63 | -0,08 |
| CCAR2   | 7,45 | -0,63 | -1,1  |
| MAP4    | 4,29 | -0,62 | 0,16  |
| GTPBP4  | 3,59 | -0,62 | -1,36 |
| NIFK    | 7,53 | -0,62 | -0,92 |
| FAU     | 3,71 | -0,59 | 0,55  |
| ZNFX1   | 3,46 | -0,56 | 0,19  |
| NKRF    | 3,83 | -0,56 | -0,04 |
| TRIM25  | 3,02 | -0,56 | -0,1  |
| NOP58   | 7,84 | -0,56 | -0,8  |
| RPL23A  | 3,74 | -0,53 | 0,37  |
| DHX9    | 4,6  | -0,5  | -0,03 |
| SRSF4   | 4,04 | -0,49 | 0,02  |
| DDX54   | 6,13 | -0,49 | -1,91 |
| SLTM    | 3,28 | -0,48 | 0,31  |
| RNPS1   | 4,28 | -0,48 | -0,33 |
| HNRNPU  | 5,47 | -0,47 | -0,38 |
| FEN1    | 3,25 | -0,44 | -0,4  |
| SARS    | 3,2  | -0,43 | 1,58  |
| SUMO2   | 3,1  | -0,43 | 1,77  |
| FXR1    | 8,17 | -0,42 | -0,28 |
| LARP1   | 3,39 | -0,42 | -0,74 |
| WDR75   | 9,6  | -0,42 | -0,24 |
| UTP20   | 6,98 | -0,39 | -0,85 |
| DHX8    | 4,41 | -0,38 | -1,19 |

|           |      |       |       |
|-----------|------|-------|-------|
| POLRMT    | 4,81 | -0,38 | -0,04 |
| RBM39     | 5,22 | -0,34 | -0,39 |
| RNH1      | 5,2  | -0,34 | 0,57  |
| GNL3      | 7,88 | -0,32 | -0,38 |
| HNRNPUL1  | 3,07 | -0,32 | -0,39 |
| RPS2      | 5,71 | -0,32 | 0,24  |
| L1RE1     | 4,02 | -0,31 | 0,39  |
| PABPC1    | 5,92 | -0,31 | 0,02  |
| PES1      | 7,8  | -0,3  | -1,47 |
| RPS20     | 5,83 | -0,29 | 0,53  |
| MAGEB2    | 6,4  | -0,28 | 0,39  |
| TRIM29    | 3,58 | -0,28 | 1,18  |
| YTHDC1    | 4,92 | -0,28 | 1,1   |
| SRSF10    | 7,53 | -0,27 | 0,52  |
| AGO-02    | 4,47 | -0,27 | -1,94 |
| DDX52     | 6,33 | -0,26 | -1,13 |
| MRPS9     | 3,52 | -0,26 | -0,76 |
| RPS18     | 4,88 | -0,25 | 0,22  |
| SPATS2L   | 5,43 | -0,24 | -0,44 |
| RPS19     | 5,08 | -0,24 | 0,96  |
| CPSF6     | 4,31 | -0,22 | -0,48 |
| XRCC6     | 5,4  | -0,21 | -0,11 |
| DDX10     | 6,61 | -0,2  | -0,63 |
| NOP56     | 7,52 | -0,19 | -0,5  |
| RPS11     | 7,59 | -0,18 | -0,49 |
| SEC61G    | 3,44 | -0,17 | -0,56 |
| TOP1      | 4,47 | -0,15 | 1,33  |
| RRP12     | 5,46 | -0,14 | -0,8  |
| STAU2     | 4,05 | -0,12 | -0,18 |
| ADAR      | 5,68 | -0,12 | -0,47 |
| U2AF1     | 5,61 | -0,11 | -0,2  |
| ABT1      | 3,5  | -0,11 | -1,45 |
| RPS15     | 7,05 | -0,11 | 1,36  |
| XRCC5     | 6,73 | -0,09 | -0,3  |
| BCLAF1    | 6,47 | -0,08 | 0,3   |
| SECISBP2L | 3,25 | -0,08 | -0,97 |
| RRP1B     | 7    | -0,06 | -0,43 |
| MRPL28    | 5,66 | -0,05 | -0,93 |
| DDX50     | 8,06 | -0,01 | -0,01 |
| THRAP3    | 5,75 | -0,01 | 0,59  |
| MOV10     | 7,65 | 0     | -0,47 |
| HP        | 3,15 | 0     | 1,82  |
| RPS7      | 4,44 | 0     | 1,49  |
| ATXN2L    | 3,92 | 0,01  | 0,27  |
| ABCF1     | 5,05 | 0,03  | 0,59  |

|         |      |      |       |
|---------|------|------|-------|
| UTP18   | 5,75 | 0,04 | 0,38  |
| BZW1    | 4,73 | 0,05 | 0,61  |
| RPL14   | 7,17 | 0,06 | -0,68 |
| SUPT6H  | 3,55 | 0,07 | -0,94 |
| NOL10   | 6,66 | 0,1  | -0,49 |
| EIF4A2  | 3,17 | 0,11 | -3,15 |
| EIF3C   | 9,54 | 0,12 | 0,14  |
| RPS14   | 5,66 | 0,14 | -0,03 |
| CSNK2A2 | 3,42 | 0,18 | -0,62 |
| NOM1    | 5,46 | 0,18 | -1,57 |
| TFB2M   | 3,19 | 0,2  | -0,56 |
| WDR43   | 3,39 | 0,21 | 0,23  |
| WDR3    | 6,68 | 0,27 | -0,74 |
| EXOSC10 | 6,35 | 0,28 | 0,31  |
| TRMT10C | 4,13 | 0,3  | 0,48  |
| RANBP2  | 6,35 | 0,33 | -0,88 |
| YTHDF2  | 3,76 | 0,33 | 0,98  |
| RPL8    | 9,86 | 0,35 | 0,27  |
| SF3B1   | 4,78 | 0,36 | -0,48 |
| NAMPT   | 3,83 | 0,37 | -0,17 |
| NOC2L   | 5,11 | 0,39 | -1,07 |
| SF3B2   | 4,38 | 0,4  | 0,06  |
| RPL27   | 4,31 | 0,41 | 0,27  |
| ASS1    | 3,21 | 0,44 | -0,95 |
| DHX57   | 5,14 | 0,47 | -0,43 |
| DUSP11  | 3,36 | 0,47 | 0,59  |
| EIF3D   | 8,47 | 0,5  | 0,19  |
| SCAF11  | 3,36 | 0,5  | 0,7   |
| NOL6    | 5,21 | 0,54 | 0,93  |
| PPIG    | 3,59 | 0,55 | -0,6  |
| RPS21   | 3,08 | 0,59 | 1,23  |
| STAU1   | 6,8  | 0,6  | 0     |
| RPS26   | 3,44 | 0,62 | 0,63  |
| PPP2R1A | 3,96 | 0,72 | 1,67  |
| DDX39B  | 4,34 | 0,73 | 0,74  |
| RPS25   | 3,03 | 0,76 | 0,61  |
| ETFA    | 3,04 | 0,76 | -0,19 |
| RPL27A  | 4,42 | 0,78 | 0,22  |
| PSMC6   | 4,57 | 0,84 | 1,61  |
| LARP4   | 5,27 | 0,85 | 0,24  |
| LSM8    | 3,66 | 0,85 | 0,95  |
| ACADVL  | 3,32 | 0,85 | 0,77  |
| ZNF638  | 3,83 | 0,87 | 0,53  |
| RPL18A  | 6,47 | 0,88 | 0,04  |
| KIF11   | 3,91 | 0,92 | -0,1  |

|         |      |      |       |
|---------|------|------|-------|
| MTHFSD  | 3,13 | 0,93 | -0,21 |
| TUBB2A  | 3,14 | 0,99 | -0,25 |
| RPS6    | 3,33 | 0,99 | -0,08 |
| FNDC3B  | 3,67 | 1,04 | 0,3   |
| GBP1    | 4,41 | 1,13 | -0,09 |
| RPS13   | 4,88 | 1,19 | 0,23  |
| RPL5    | 5,05 | 1,2  | 0,09  |
| NES     | 4,65 | 1,2  | -1    |
| RPL17   | 4,4  | 1,21 | 0,47  |
| CSE1L   | 3,12 | 1,21 | 0,9   |
| EIF2B4  | 3,31 | 1,35 | -0,09 |
| STRAP   | 3,64 | 1,39 | 0,8   |
| FASN    | 3,13 | 1,4  | 1,36  |
| NOC4L   | 3,36 | 1,48 | 1,64  |
| RPS4X   | 4,1  | 1,49 | 0,57  |
| RPS16   | 4,11 | 1,53 | 0,72  |
| RPL24   | 5,05 | 1,59 | 1     |
| ATXN2   | 4,65 | 1,64 | 1,36  |
| RPS5    | 5,03 | 1,65 | 0,22  |
| DDX3Y   | 3,16 | 1,66 | -2,49 |
| RPL23   | 3,7  | 1,68 | 1,12  |
| PSMC3   | 3,7  | 1,71 | 2,05  |
| RPL11   | 3,87 | 1,73 | 0,58  |
| RPL21   | 5,08 | 1,75 | 0,97  |
| RPS3A   | 4,68 | 1,82 | 0,93  |
| RPL7A   | 3,83 | 1,82 | 0,87  |
| RPS17   | 3,33 | 1,82 | 0,98  |
| EIF3L   | 4,5  | 1,86 | 1,32  |
| POLR2B  | 3,79 | 1,9  | 0,92  |
| RPS27   | 4,17 | 1,92 | 1,51  |
| COPB1   | 3,11 | 2    | 1,4   |
| BOP1    | 5,3  | 2,04 | -0,66 |
| MCM6    | 3,56 | 2,07 | -1,21 |
| GRHPR   | 3,03 | 2,1  | 1,14  |
| RPL10A  | 4,65 | 2,1  | 0,71  |
| RPSA    | 4,8  | 2,18 | 1,47  |
| MMS19   | 3,15 | 2,28 | -2,15 |
| NAP1L1  | 3,27 | 2,37 | 2,22  |
| RPL3    | 6,17 | 2,66 | 0,88  |
| RPS8    | 4,42 | 2,74 | 1,06  |
| NAT10   | 5,31 | 2,86 | 0,68  |
| EIF2AK2 | 3,05 | 3,21 | 1,52  |
| CCT8    | 4,26 | 3,24 | 1,37  |
| HEATR1  | 6,4  | 3,46 | 0,51  |
| RPL10   | 5,54 | 3,55 | 1,98  |



|       |      |      |      |
|-------|------|------|------|
| TUBB8 | 5,17 | 4,56 | 1,2  |
| RPLP0 | 3,04 | 5,06 | 3,77 |
